# Supplementary material
Source: Copernicus journal article supplement (doi:10.5194/egusphere-2026-2868)
Supplement: Supplementary file 1 [file egusphere-2026-2868-supplement.pdf]

1 **SI Figures**

2 **Figure S1:** Transmission and detection efficiency of the detection systems used for (a) multi-grain and (b) spatially resolved  
3 RF. Three bandpass filters were used centered at 710, 850 or 880 nm, with FWHM of 10, 30 (PMT) / 40 (CCD) and 10 nm,  
4 respectively. The filter packs for the CCD system also include plano-convex lenses.

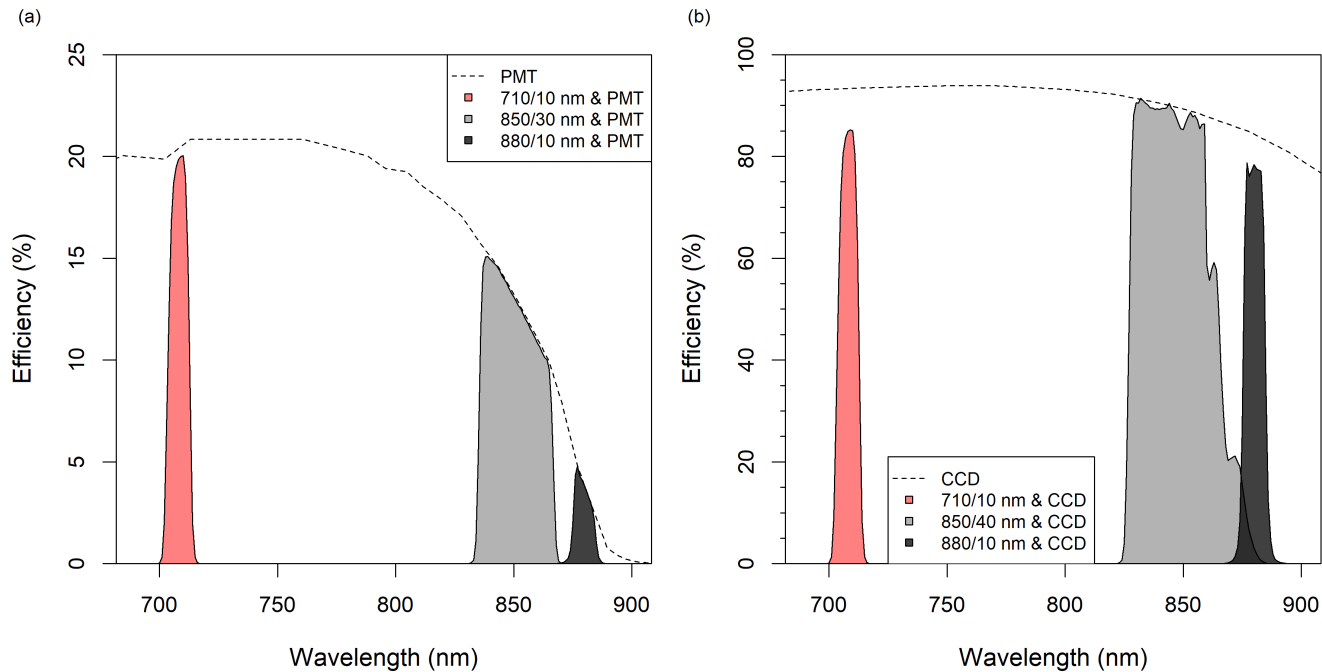

5  
6  
7  
8  
9  
10  
11  
12  
13  
14  
15  
16  
17  
18

19 **Figure S2:** A 20 x 20  $\mu\text{m}$   $\mu\text{-XRF}$  map at 10 keV of the resin sample holder, with a step size of 1  $\mu\text{m}$  and a dwell time of  
20 0.05s.

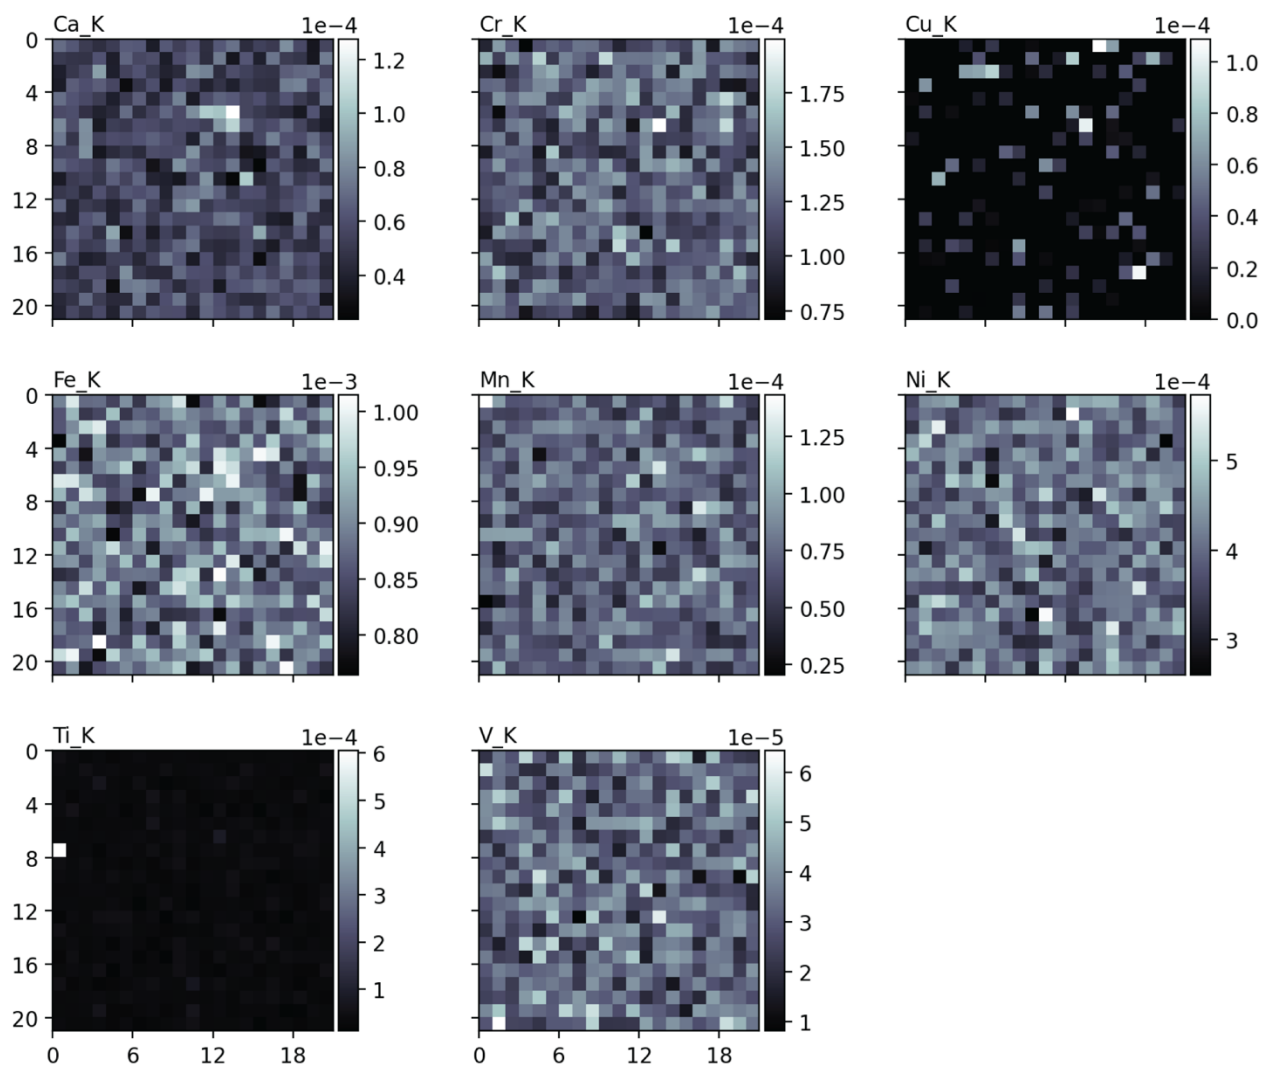

1 pixel = 1  $\mu\text{m}$

21  
22  
23  
24  
25

26 **Figure S3:** A 200 x 200  $\mu\text{m}$   $\mu\text{-XRF}$  map at 10 keV of the microcline sample (NMNH143966), with a step size of 1  $\mu\text{m}$  and a  
27 dwell time of 0.1 s.

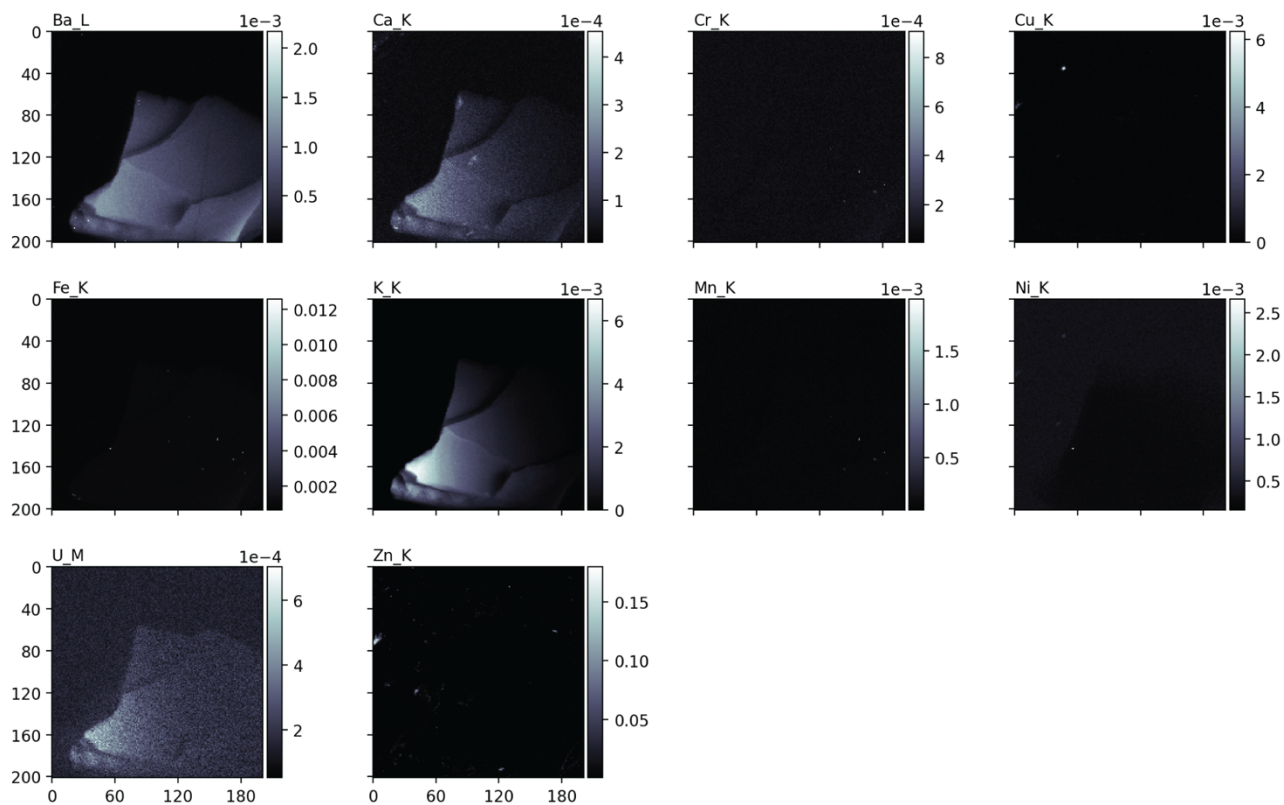

1 pixel = 1  $\mu\text{m}$

28  
29  
30  
31  
32  
33  
34  
35  
36  
37  
38

39 **Figure S4:** A 250 x 200  $\mu\text{m}$   $\mu\text{-XRF}$  map at 10 keV of the albite sample (SBU Amelia Albite), with a step size of 1  $\mu\text{m}$  and a  
40 dwell time of 0.1 s.

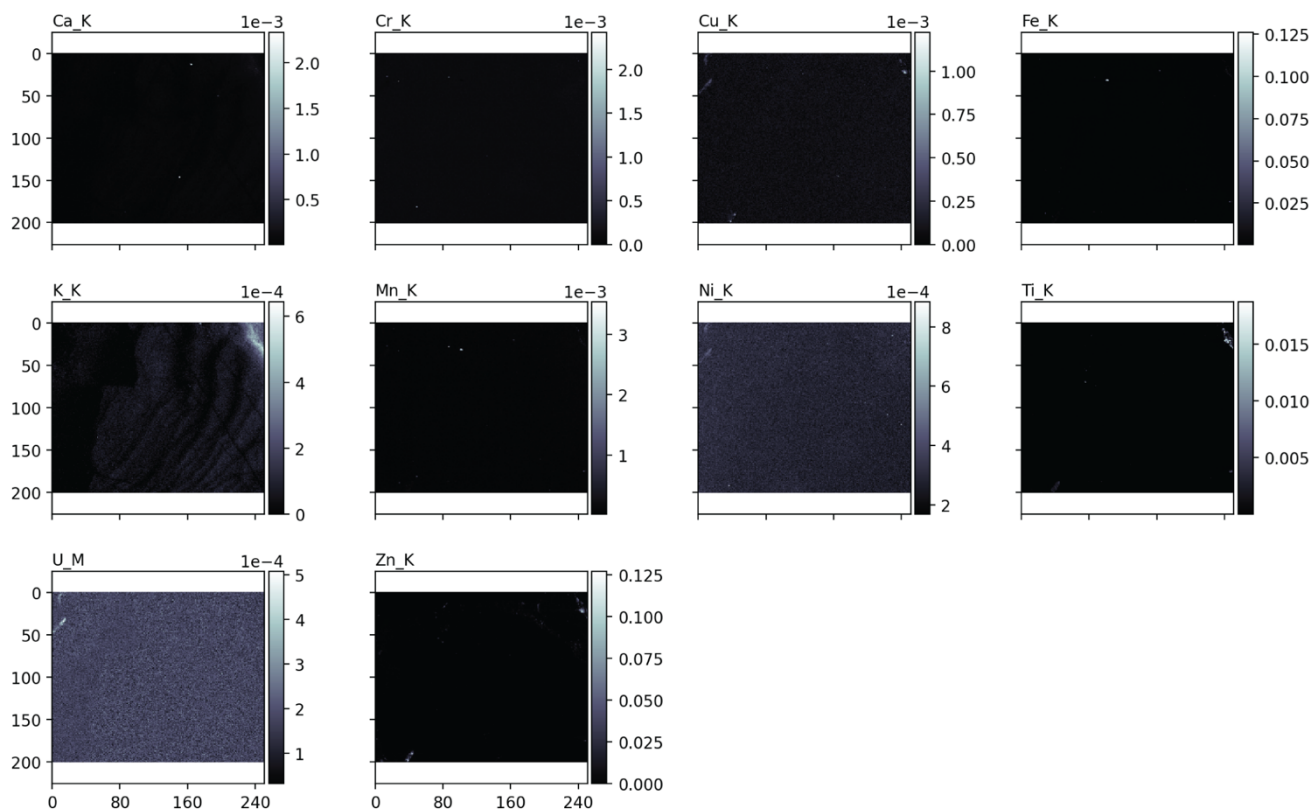

1 pixel = 1  $\mu\text{m}$

41  
42  
43  
44  
45  
46  
47  
48  
49  
50  
51  
52

53 **Figure S5:** A 200 x 200  $\mu\text{m}$   $\mu\text{-XRF}$  map at 10 keV of the labradorite sample (NMNH115900), with a step size of 1  $\mu\text{m}$  and a  
54 dwell time of 0.1 s.

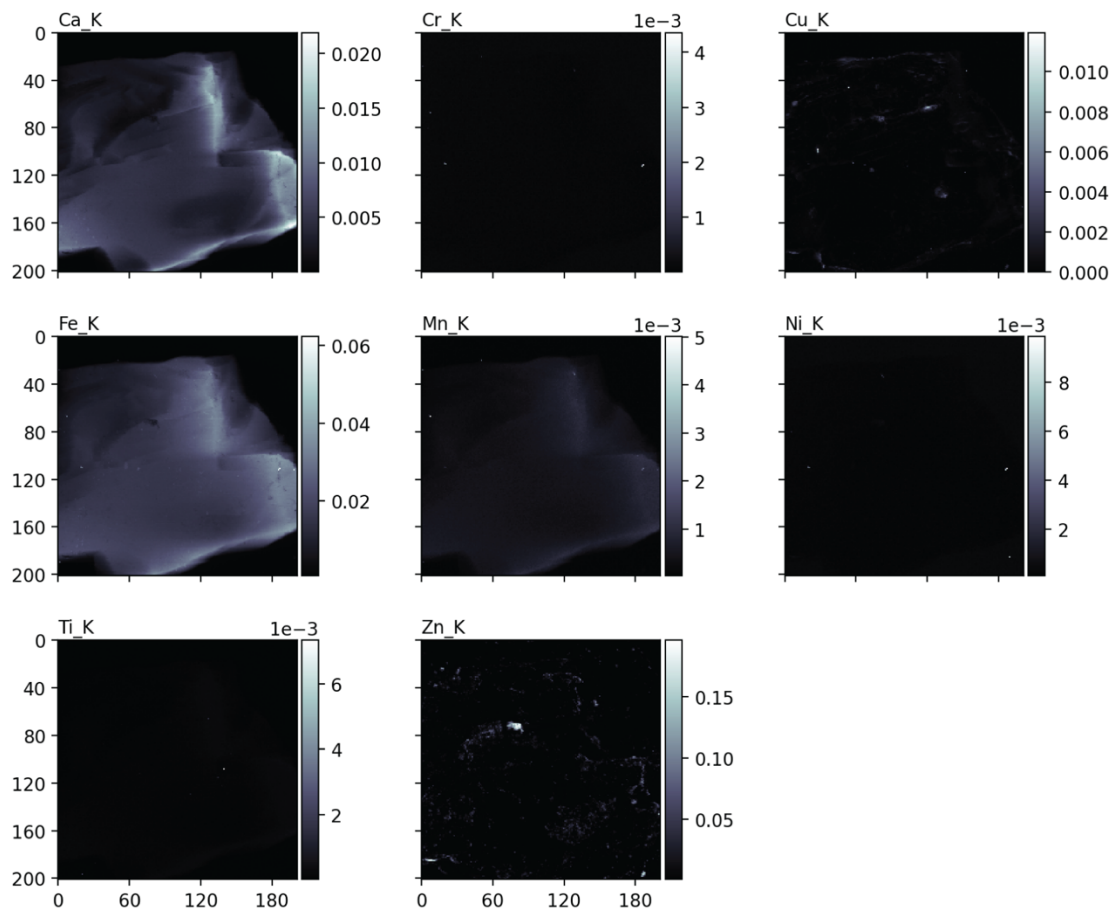

1 pixel = 1  $\mu\text{m}$

55  
56  
57  
58  
59  
60  
61  
62

63 **Figure S6:** A 300 x 200  $\mu\text{m}$   $\mu\text{-XRF}$  map at 10 keV of the anorthite sample (NMNH137041), with a step size of 1  $\mu\text{m}$  and a  
64 dwell time of 0.1 s.

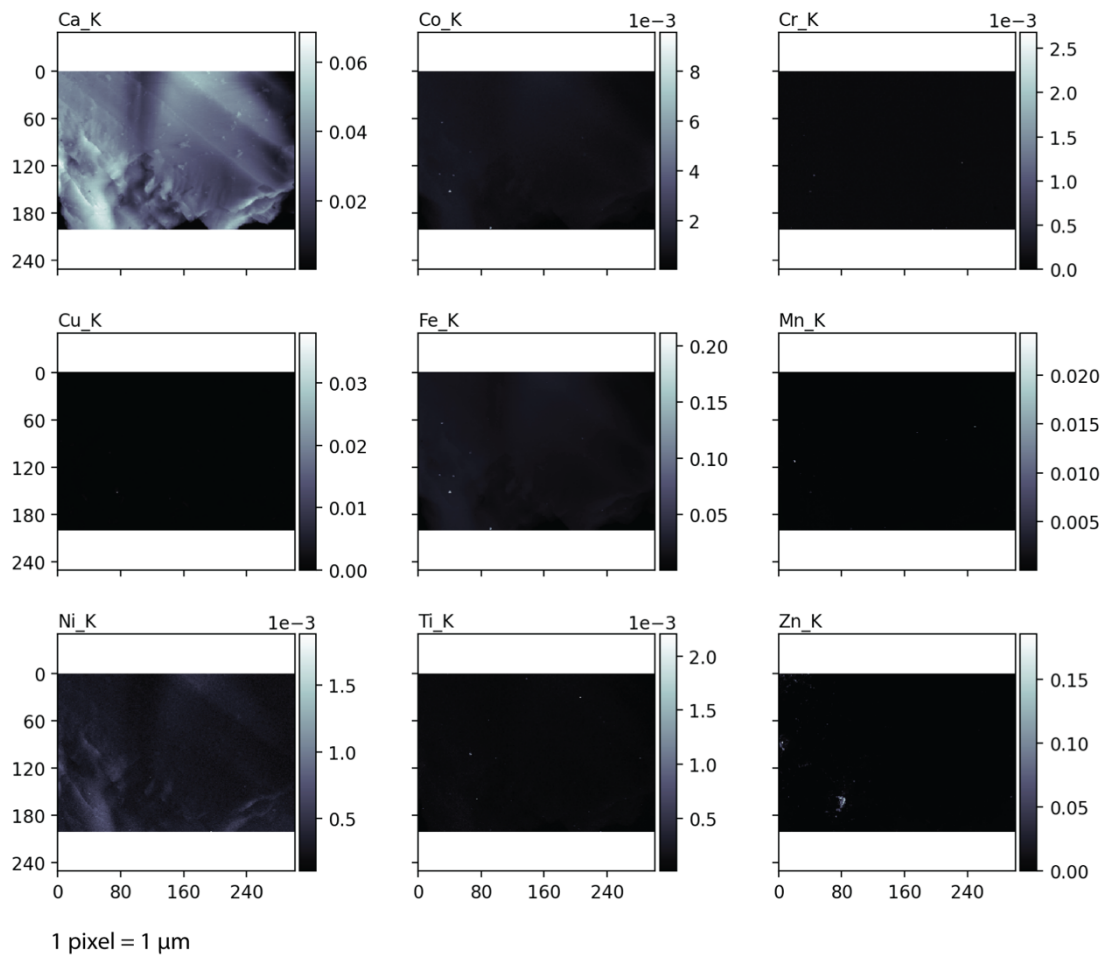

65  
66  
67  
68  
69  
70  
71  
72  
73

74 **Figure S7:** A 200 x 100  $\mu\text{m}$   $\mu\text{-XRF}$  map at 10 keV of the sanidine sample (FCs), with a step size of 1  $\mu\text{m}$  and a dwell time  
75 of 0.05 s.

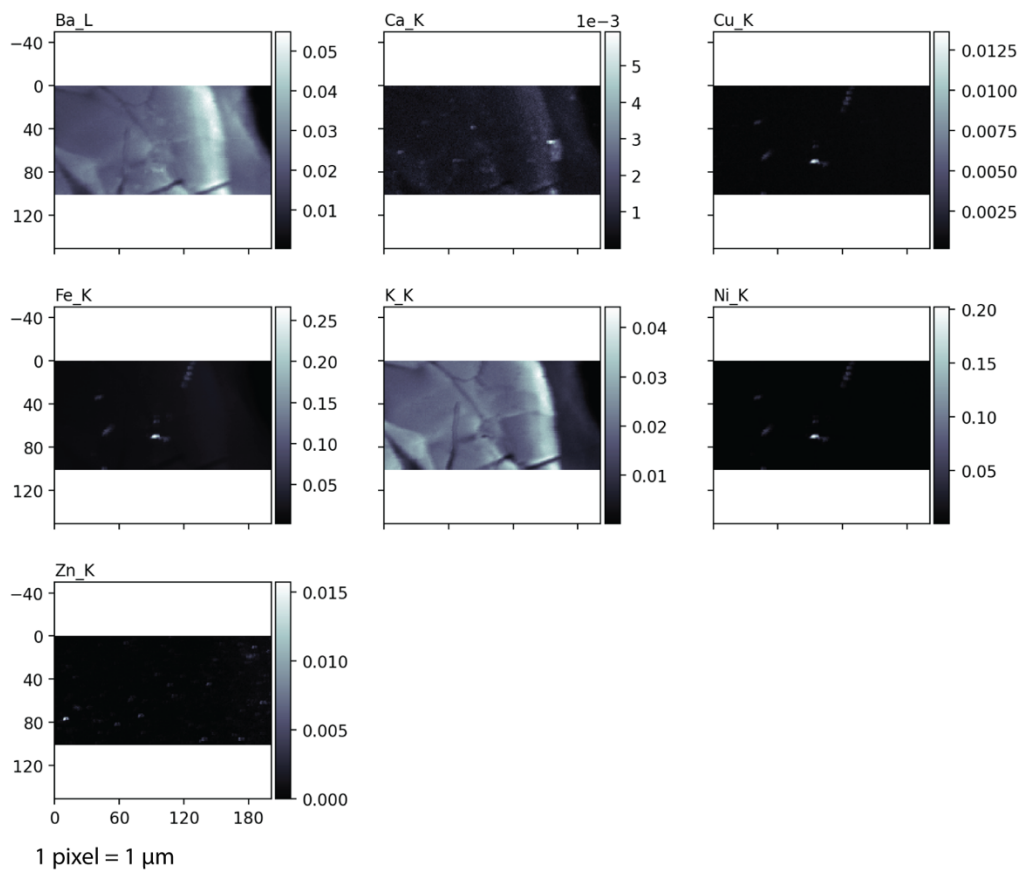

76  
77  
78  
79  
80  
81  
82  
83  
84  
85

86 **Figure S8:** IR-RF dose response curve of the microcline sample (grey) detected through an 850/30 nm filter fit with the stretched  
87 exponential function proposed by Erfurt and Krbetschek, 2003 (black line).

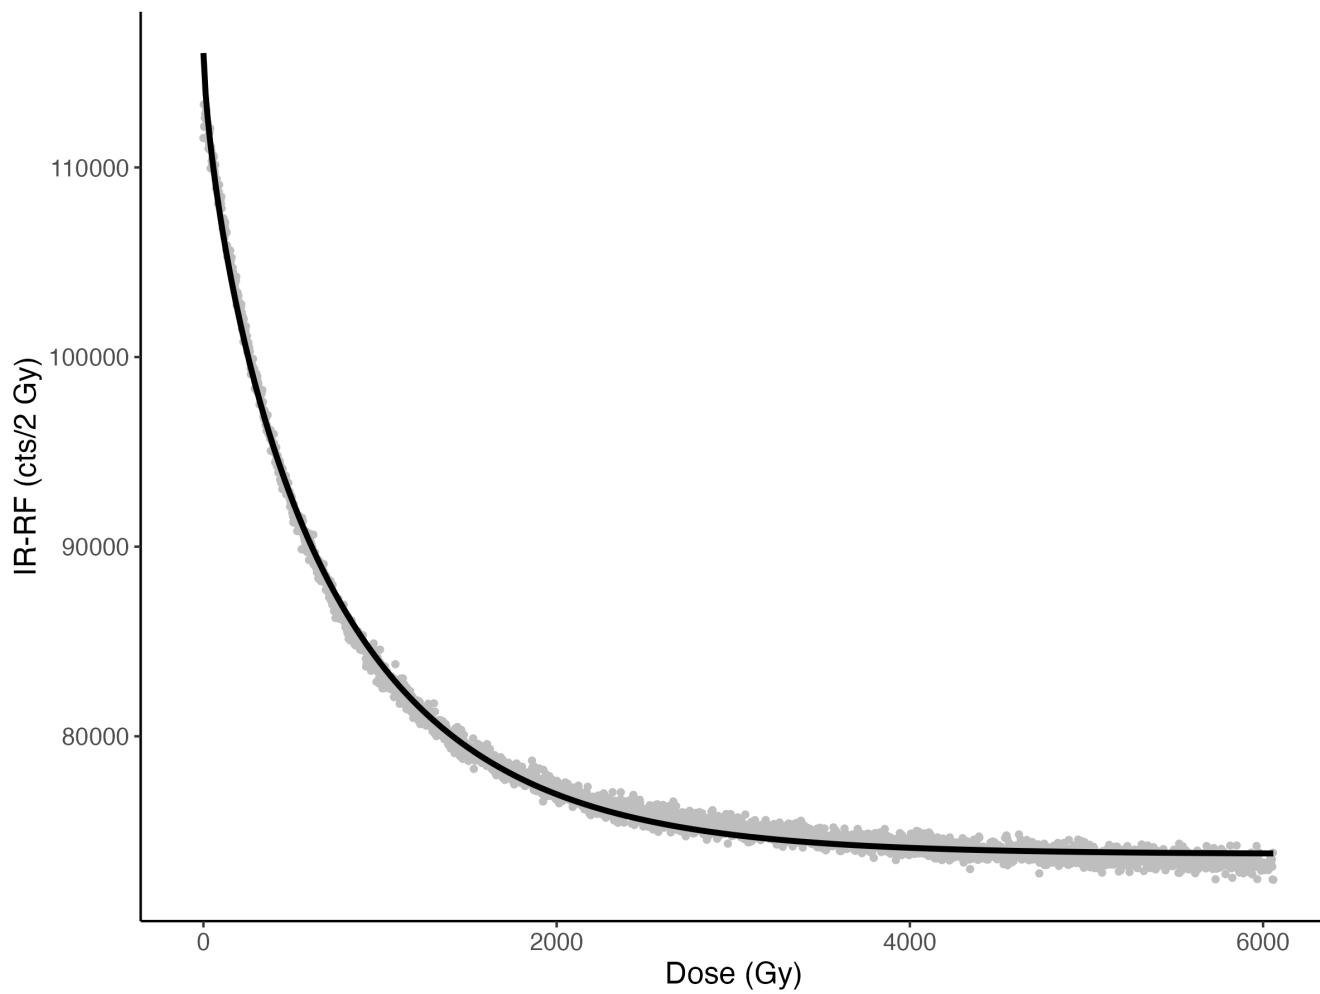

88  
89  
90  
91  
92  
93  
94  
95  
96  
97

98 **Figure S9:** Comparison of the quartz 100°C thermoluminescence (TL) peaks between three sample holders: aluminum  
99 single-grain disc (yellow dashed line), stainless steel cup (blue dashed line), and the resin single-grain sample holder (black  
100 solid line).

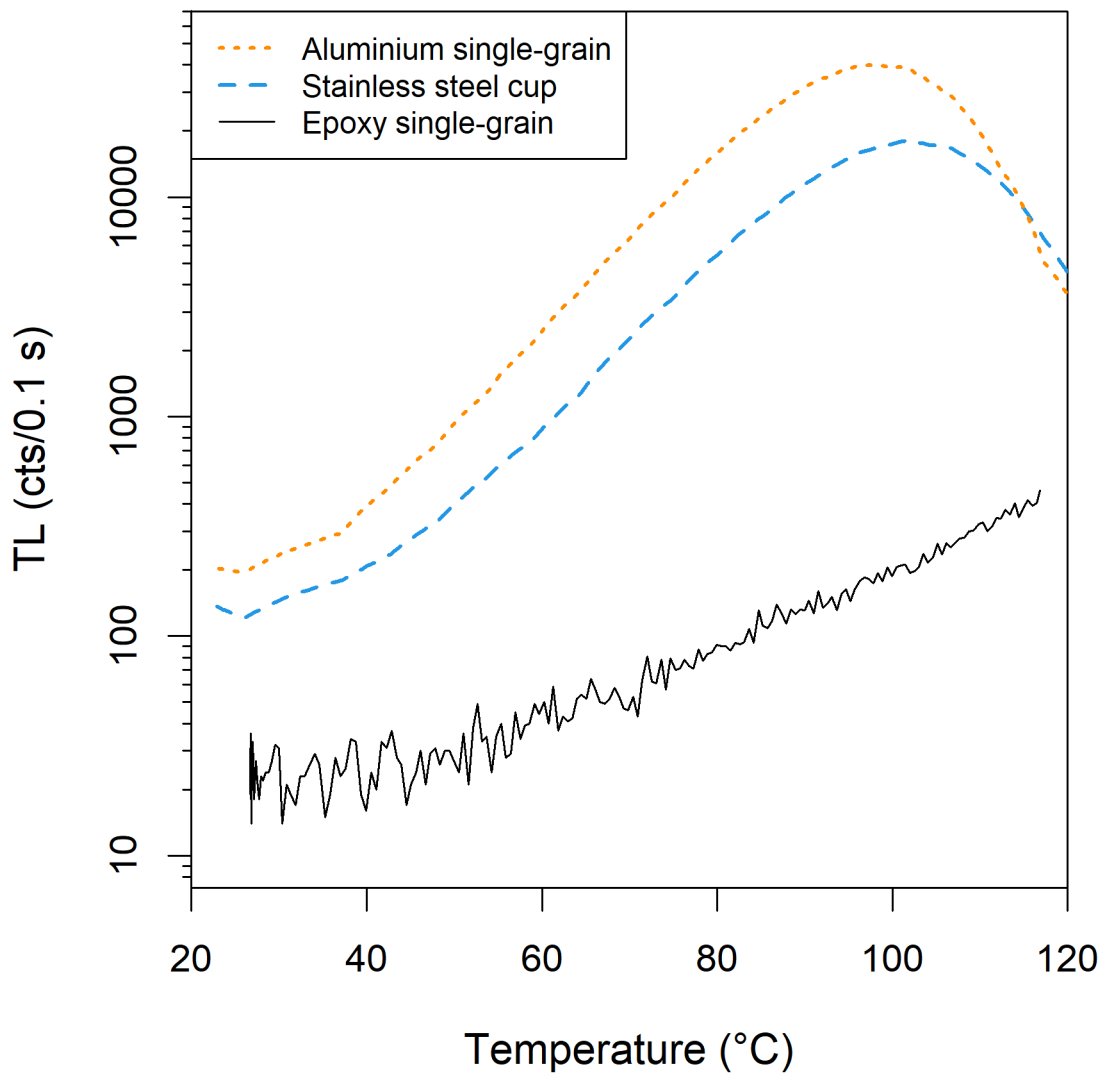

101  
102  
103  
104  
105

**Figure S10:** SR IR-RF Dose Response Curves (DRCs) for natural samples: (a) X7363 and (b) X7368.

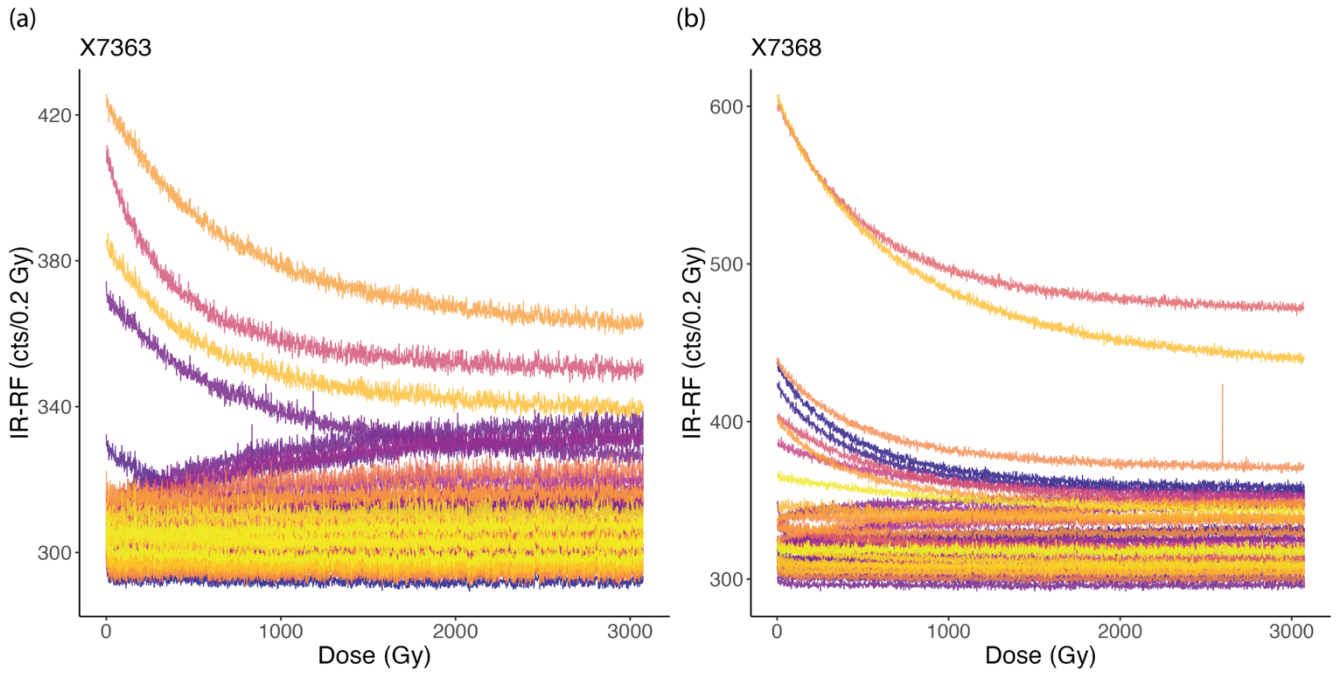

107  
108  
109  
110  
111  
112  
113  
114  
115  
116  
117  
118  
119  
120  
121  
122  
123

124 **Figure S11:** SR IR-RF Dose Response Curves (DRCs) for natural samples: (a) X7363 and (b) X7368 that are classified as  
125 having a 'category 1' DRC that decreases with dose accumulation.

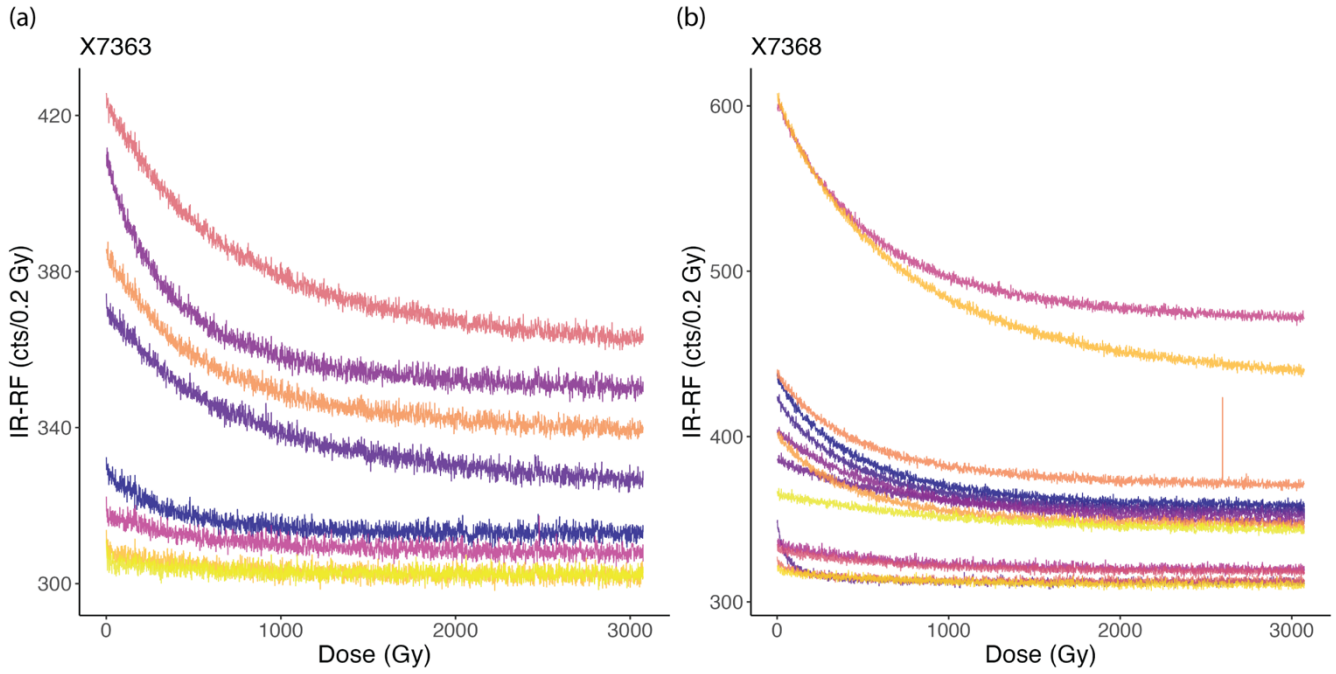

126  
127  
128  
129  
130  
131  
132  
133  
134  
135  
136  
137  
138

## SI Tables

**Table S1:** Element composition of Anorthite, Microcline, Labradorite, Albite, and Fish Canyon Tuff Sanidine.

| Sample Name                                     | Composition (wt %)             |             |                                |             |                  |                  |       |      |                   |                  |                  |             |             |
|-------------------------------------------------|--------------------------------|-------------|--------------------------------|-------------|------------------|------------------|-------|------|-------------------|------------------|------------------|-------------|-------------|
|                                                 | Al <sub>2</sub> O <sub>3</sub> | CaO         | Fe <sub>2</sub> O <sub>3</sub> | FeO         | H <sub>2</sub> O | K <sub>2</sub> O | MgO   | MnO  | Na <sub>2</sub> O | SiO <sub>2</sub> | TiO <sub>2</sub> | SrO         | BaO         |
| Anorthite<br>(NMNH 137041) <sup>1</sup>         | 36.03                          | 19.09       | -                              | 0.62        | -                | 0.03             | <0.02 | -    | 0.53              | 44               | 0.03             | -           | -           |
| Microcline<br>(NMNH 143966) <sup>1</sup>        | 18.3                           | 0.02        | 0                              | 0.04        | -                | 15.14            | 0.03  | 0.04 | 1.3               | 64.24            | 0.01             | -           | -           |
| Labradorite<br>(NMNH 115900) <sup>1</sup>       | 30.91                          | 13.64       | 0.34                           | 0.15        | 0.05             | 0.18             | 0.14  | 0.01 | 3.45              | 51.25            | 0.05             | -           | -           |
| Albite<br>(SBU Amelia Albite) <sup>2</sup>      | 19.19                          | -           | -                              | -           | -                | 0.29             | -     | -    | 9.78              | 70.73            | -                | -           | -           |
| Fish Canyon Tuff<br>Sanidine (FCs) <sup>3</sup> | 19.57 ± 0.16                   | 0.21 ± 0.03 | -                              | 0.11 ± 0.02 | -                | 12.60 ± 0.17     | -     | -    | 2.70 ± 0.07       | 64.60 ± 0.31     | -                | 0.13 ± 0.03 | 0.88 ± 0.43 |

<sup>1</sup> Data sourced from the Smithsonian Microbeam Standards Dataset (Jarosewich, 1980)

<sup>2</sup> Data sourced from the Stony Brook Microbeam Analysis Lab Probe

<sup>3</sup> Data sourced from Zimmerer and McIntosh (2011). Values are averages of 15 analyses; errors are reported as one standard deviation.

## References

Jarosewich, E., Nelen, J. A., and Norberg, J. A. (1980) Reference Samples for Electron Microprobe Analysis. *Geostandards Newsletter* 4, p. 43-47

Zimmerer, M. J., McIntosh, W. C.: 40Ar/39Ar dating, sanidine chemistry and potential sources of the Las Tablas Tuff, northern New Mexico, *in: Geology of the Tusas Mountains and Ojo Caliente Area*, Koning, Daniel J.; Karlstrom, Karl E.; Kelley, Shari A.; Lueth, Virgil W.; Aby, Scott B., *ed(s)*, New Mexico Geol. Soci. Guidebook, 62, 215-222, 2011
